# Supplementary material for: PCV2 Induced Endothelial Derived IL-8 Affects MoDCs Maturation Mainly via NF-κB Signaling Pathway
Source: MDPI journal article supplement (doi:10.3390/v16040646), 2024-04-22
Supplement: s1 [file s1]

**Table S1.** Result of differentially expressed genes ( $P < 0.05$ ).

| Group                                                                                            | Gene                                                                                                                                                                                                                                                                                                                                                                  |
|--------------------------------------------------------------------------------------------------|-----------------------------------------------------------------------------------------------------------------------------------------------------------------------------------------------------------------------------------------------------------------------------------------------------------------------------------------------------------------------|
| <b>Immune response</b>                                                                           |                                                                                                                                                                                                                                                                                                                                                                       |
| PIECs-DCs vs DCs                                                                                 | <p>↑: CCL24.CCR1. CXCL10. CXCL13. CXCL14. CD74. JUN. SLA-DQA1. LSA-DOB. XCL1. CCL14. CCL3L1. CCL4. CCR5. CXCL2. CSF2. IL-1A. IL-10. IL-6. TLR7.</p> <p>↓: OAS1.OAS2. CCL17. CCL20.CCR7. CD36. CD70. LOC106504372. LOC100520439. SLA-3. SLA-DRA. SLA-DRB1. SLA-DMB. SLA-DMA. SLA-DQB1. CSF3.IL-12A.IL-12B.IL-15.IL-19. IL-2RA.IL-23A.THBS1. TNFSF10. TNFSF11. VTN.</p> |
| PCV2-PIECs-DCs vs PIECs-DCs                                                                      | <p>↑: OAS1. CCL17. CCL20. CCL24. CXCL12. CXCL10. CXCL14. VTN. IL-6. IL-7. TGFBR3. IL-10.</p> <p>↓: CCR2. CCR7. CCR4. CD36. CD70. CD74.SLA-DQA1. SLA-DRB1. SLA-DMB. SLA-DOB. SLA-DMA. SLA-DQB1. SLA-DRA. TNFSF11. IL-12B. CSF3. PPBP. THBS1. TNFSF10.</p>                                                                                                              |
| IL-8 <sup>over</sup> -PIECs-DCs vs PIECs-DCs                                                     | <p>↑: CCL24. CXCL13. CXCL10. CXCL14. CD36. CD74. IL-6.</p> <p>↓: OAS1. CCL20. CCR7. CD70. SLA-DQA1. SLA-DRB1. SLA-DMB. SLA-DOB. SLA-DMA. SLA-DQB1. AMCF-II. CSF3. IL-12B. IL-18. IL-2RA. IL-23A. IL-7. THBS1.</p>                                                                                                                                                     |
| IL-8 <sup>si</sup> -PIECs-DCs vs PIECs-DCs                                                       | <p>↑: CCL20. CCL5. CCR2. CXCL12. CD70.SLA-DQA1. SLA-DRB1. SLA-DMB. SLA-DMA. SLA-DQB1. SLA-DRA. XCL1. IL-12B. IL-12A.</p> <p>↓: OAS2. CCL24. CXCL13. CXCL10. CXCL14. CD36. CD74. TNFAIP1. CCL14. IL-6. CCL8.</p>                                                                                                                                                       |
| <b>Antigen processing and presentation of peptide or polysaccharide antigen via MHC class II</b> |                                                                                                                                                                                                                                                                                                                                                                       |
| PIECs-DCs vs DCs                                                                                 | <p>↑: LOC100520439.SLA-DOB.</p> <p>↓: LOC106504372.SLA-DRA. SLA-DQA1.SLA-DRB1.SLA-DMB.SLA-DMA.SLA-DQB1.SLA-DOA.</p>                                                                                                                                                                                                                                                   |
| PCV2-PIECs-DCs vs PIECs-DCs                                                                      | <p>↑: LOC100520439.</p> <p>↓: LOC106504372. SLA-DRA. SLA-DQA1.SLA-DRB1.SLA-DMB.SLA-DMA.SLA-DQB1.SLA-DOA.SLA-DOB.</p>                                                                                                                                                                                                                                                  |
| IL-8 <sup>over</sup> -PIECs-DCs vs PIECs-DCs                                                     | <p>↑: LOC106504372</p> <p>↓: LOC100520439. SLA-DQA1. SLA-DRB1. SLA-DMB. SLA-DMA. SLA-DQB1. SLA-DOB.</p>                                                                                                                                                                                                                                                               |
| IL-8 <sup>si</sup> -PIECs-DCs vs PIECs-DCs                                                       | <p>↑: LOC106504372. SLA-DRA. SLA-DQA1.SLA-DRB1.SLA-DMB.SLA-DMA.SLA-DQB1.</p> <p>↓: LOC100520439.</p>                                                                                                                                                                                                                                                                  |
| <b>Inflammatory response</b>                                                                     |                                                                                                                                                                                                                                                                                                                                                                       |
| PIECs-DCs vs DCs                                                                                 | <p>↑: CCR1. CXCL10.CXCL13. RELA. IL-10. TLR6. TLR7. TLR8.</p> <p>↓: CCL17. CCL20. CCR7. CXCR6. JAK2. IL-17F. IL-19. IL-2RA. IL-23A. TLR2. TLR4.</p>                                                                                                                                                                                                                   |
| PCV2-PIECs-DCs vs PIECs-DCs                                                                      | <p>↑: CCL17. CCL20. AMCF-II. CXCL10. CXCR6. TLR7.</p> <p>↓: CCR2. CCR4. RELA. JAK2. IL-17B. IL-18. IL-23°. TLR8. TLR4.</p>                                                                                                                                                                                                                                            |
| IL-8 <sup>over</sup> -PIECs-DCs vs PIECs-DCs                                                     | <p>↑: CXCL10. CCL4.</p> <p>↓: CCL20. CCR2. CCR3. CCR7. RELA. TNFRSF1A.IL-23A. TLR1. TLR10. TLR8.</p>                                                                                                                                                                                                                                                                  |
| IL-8 <sup>si</sup> -PIECs-DCs vs PIECs-DCs                                                       | <p>↑: CCL20. CCR2. CCL5. CCR3. CXCL12. RELA. IL-18. IL-23°. IL-2RA. TLR8.</p> <p>↓: CXCL10. CXCL13. CCL4. CCL8. TLR3. TLR4.</p>                                                                                                                                                                                                                                       |
| <b>Cell adhesion</b>                                                                             |                                                                                                                                                                                                                                                                                                                                                                       |

|                                    |                                              |
|------------------------------------|----------------------------------------------|
| PIECs-DCs vs ↑:                    | CD2.                                         |
| DCs                                | ↓: THY1. ADGRG1. CERCAM. ITGA2.              |
| PCV2-PIECs-DCs vs                  | ↑: CD2. ITGB5.                               |
| PIECs-DCs                          | ↓: CASS4. THY1. WISP2. ADGRG1. ITGA2. ITGA6. |
| IL-8 <sup>over</sup> -PIECs-DCs vs | ↑: CX3CR1. CASS4.                            |
| PIECs-DCs                          | ↓: CD2. THY1. ITGA6. THBS3.                  |
| IL-8 <sup>si</sup> -PIECs-DCs vs   | ↑: THY1. ADGRG1. ITGA6. ITGB5. ICAM1. ICAM3. |
| PIECs-DCs                          | ↓: CD2.                                      |
| <b>Angiogenesis</b>                |                                              |
| PIECs-DCs vs ↑:                    |                                              |
| DCs                                | ↓: THY1. ADGRG1. ANG. ANGPT2. ANGPT4.        |
| PCV2-PIECs-DCs vs                  | ↑: PECAM1.                                   |
| PIECs-DCs                          | ↓: TGFA. VEGFA. ANG. ANGPT2. THY1.           |
| IL-8 <sup>over</sup> -PIECs-DCs vs | ↑: PECAM1.                                   |
| PIECs-DCs                          | ↓: THY1. ADGRG1. ANG. ANGPT4. VEGFA.         |
| IL-8 <sup>si</sup> -PIECs-DCs vs   | ↑: THY1. ADGRG1. ANG. ANGPT4. VEGFA.         |
| PIECs-DCs                          | ↓: ANGPT2.                                   |

**Table S2.** GO analysis results of differentially expressed genes.

| Group                                        | Item                                              | Gene Number | Up-Regulated | Down-Regulated |
|----------------------------------------------|---------------------------------------------------|-------------|--------------|----------------|
| <b>Biological process</b>                    |                                                   |             |              |                |
| PIECs-DCs vs DCs                             | cell-cell adherens junction                       | 4           | 1            | 3              |
|                                              | positive regulation of angiogenesis cell adhesion | 5           | 3            | 2              |
|                                              | cell adhesion                                     | 26          | 14           | 12             |
|                                              | Angiogenesis                                      | 10          | 6            | 4              |
|                                              | regulation of cell adhesion                       | 19          | 11           | 8              |
|                                              | immune response                                   | 48          | 20           | 28             |
|                                              | I-kappaB kinase/NF-kappaB signaling               | 17          | 6            | 11             |
|                                              | adherens junction                                 | 12          | 5            | 7              |
|                                              | inflammatory response                             | 24          | 11           | 13             |
|                                              | cell migration                                    | 24          | 8            | 16             |
|                                              | cell differentiation                              | 63          | 34           | 29             |
|                                              | chemotaxis                                        | 11          | 6            | 5              |
|                                              | immune response                                   | 30          | 14           | 16             |
| PCV2-PIECs-DCs vs PIECs-DCs                  | cell migration                                    | 17          | 8            | 9              |
|                                              | chemotaxis                                        | 11          | 4            | 7              |
|                                              | JAK-STAT cascade                                  | 9           | 4            | 5              |
|                                              | angiogenesis                                      | 11          | 3            | 8              |
|                                              | cell adhesion                                     | 17          | 5            | 12             |
| IL-8 <sup>over</sup> -PIECs-DCs vs PIECs-DCs | immune response                                   | 46          | 17           | 29             |
|                                              | cell adhesion                                     | 22          | 8            | 14             |
|                                              | inflammatory response                             | 25          | 7            | 18             |

|                                                      |                                     |     |    |    |
|------------------------------------------------------|-------------------------------------|-----|----|----|
|                                                      | chemotaxis                          | 14  | 4  | 10 |
|                                                      | cell migration                      | 21  | 6  | 17 |
|                                                      | endocytosis                         | 11  | 6  | 5  |
|                                                      | JAK-STAT cascade                    | 5   | 2  | 3  |
|                                                      | cytokine-mediated signaling pathway | 15  | 5  | 10 |
|                                                      | I-kappaB kinase/NF-kappaB signaling | 7   | 2  | 5  |
| IL-8 <sup>si</sup> -PIECs-DCs<br>vs PIECs-DCs        | immune response                     | 49  | 27 | 22 |
|                                                      | cell adhesion                       | 21  | 15 | 6  |
|                                                      | endocytosis                         | 14  | 8  | 6  |
|                                                      | cell migration                      | 24  | 14 | 10 |
|                                                      | axonogenesis                        | 6   | 4  | 2  |
|                                                      | I-kappaB kinase/NF-kappaB signaling | 7   | 4  | 3  |
|                                                      | chemotaxis                          | 17  | 8  | 9  |
|                                                      | JAK-STAT cascade                    | 9   | 5  | 4  |
| <b>Cellular component</b>                            |                                     |     |    |    |
| PIECs-DCs vs<br>DCs                                  | cell-cell junction                  | 10  | 6  | 4  |
|                                                      | cell-cell adherens junction         | 4   | 3  | 1  |
|                                                      | actin filament                      | 4   | 3  | 1  |
|                                                      | microtubule cytoskeleton            | 16  | 5  | 11 |
| PCV2-PIECs-DCs<br>vs PIECs-DCs                       | actin cytoskeleton                  | 13  | 6  | 7  |
|                                                      | actin cytoskeleton                  | 11  | 8  | 3  |
|                                                      | extracellular space                 | 49  | 29 | 20 |
|                                                      | cytoskeleton                        | 23  | 10 | 13 |
| IL-8 <sup>over</sup> -PIECs-<br>DCs vs PIECs-<br>DCs | Adherens junction                   | 8   | 3  | 5  |
|                                                      | cell-cell adherens junction         | 4   | 2  | 2  |
|                                                      | actin cytoskeleton                  | 10  | 6  | 4  |
|                                                      | cell junction                       | 19  | 11 | 8  |
| IL-8 <sup>si</sup> -PIECs-DCs<br>vs PIECs-DCs        | cytoskeleton                        | 31  | 21 | 10 |
|                                                      | extracellular region                | 143 | 84 | 59 |
|                                                      | cell-cell junction                  | 7   | 4  | 3  |
|                                                      | adherens junction                   | 10  | 3  | 7  |
|                                                      | cytoskeleton                        | 25  | 10 | 15 |
| PIECs-DCs vs<br>DCs                                  | actin cytoskeleton                  | 7   | 5  | 2  |
| <b>molecular function</b>                            |                                     |     |    |    |
| PIECs-DCs vs<br>DCs                                  | endopeptidase activity              | 17  | 6  | 11 |
|                                                      | oxidoreductase activity, acting on  |     |    |    |
|                                                      | a sulfur group of donors            | 5   | 3  | 2  |
|                                                      | cytoskeletal protein binding        | 25  | 12 | 13 |
|                                                      | transcription factor binding        | 9   | 3  | 6  |
| PCV2-PIECs-DCs<br>vs PIECs-DCs                       | cytokine activity                   | 19  | 8  | 11 |
|                                                      | transcription factor binding        | 6   | 2  | 4  |
|                                                      | cytokine activity                   | 13  | 4  | 9  |
|                                                      | endopeptidase activity              | 11  | 3  | 8  |
| IL-8 <sup>over</sup> -PIECs-<br>DCs vs PIECs-<br>DCs | receptor activity                   | 28  | 15 | 13 |
|                                                      | cytokine binding                    | 5   | 1  | 4  |
|                                                      | transcription factor binding        | 5   | 2  | 3  |
|                                                      | endopeptidase activity              | 21  | 13 | 7  |
| IL-8 <sup>si</sup> -PIECs-DCs                        | chemokine activity                  | 4   | 3  | 1  |
|                                                      | endopeptidase activity              | 19  | 12 | 7  |

|              |                                                                                                                                                                      |    |    |   |
|--------------|----------------------------------------------------------------------------------------------------------------------------------------------------------------------|----|----|---|
| vs PIECs-DCs | transcription factor binding                                                                                                                                         | 8  | 6  | 2 |
|              | oxidoreductase activity, acting on paired donors, with incorporation or reduction of molecular oxygen, NAD(P)H as one donor, and incorporation of one atom of oxygen | 5  | 3  | 2 |
|              | cytokine activity                                                                                                                                                    | 18 | 11 | 7 |
|              |                                                                                                                                                                      |    |    |   |
